# Supplementary material for: Metformin Treatment Suppresses Melanoma Cell Growth and Motility through Modulation of microRNA Expression
Source: PubMed Central journal article supplement (PMC6406940; doi:10.3390/cancers11020209), 2019-02-11
Supplement: cancers-11-00209-s001.pdf [file cancers-11-00209-s001.pdf]

# Supplementary Materials: Metformin Treatment Suppresses Melanoma Cell Growth and Motility Through Modulation of microRNA Expression

Hui-Wen Tseng, Sung-Chou Li and Kuo-Wang Tsai

**Table S1.** Summary of sequence reads and the detected miRNAs in four libraries.

| Sample    | Total Reads | Clead Reads( %)   | miRNAs |
|-----------|-------------|-------------------|--------|
| A2058-C   | 11909638    | 11734194 (98.53%) | 1155   |
| A2058-Met | 13141031    | 12904655 (98.20%) | 1261   |
| A375-C    | 12376430    | 1194227 (96.53%)  | 1143   |
| A375-Met  | 14184012    | 13965787 (98.46%) | 1229   |

**Table S2.** Target candidates of miR-192-5p and miR-584-3p were identified using a microarray approach and a bioinformatics approach.

| Targets of miR-192-5p | Targets of miR-584-3p |
|-----------------------|-----------------------|
| EFEMP1                | SCAMP3                |
| CTH                   | PSMB1                 |
| RPL4                  | TM4SF19               |
| PPP1CA                | CABP7                 |
| SDS                   | LPCAT3                |
| KIAA1467              | IMP4                  |
| ATF3                  | TYR                   |
| PABPC4                | BAX                   |
| GOT1                  | GDF15                 |
| CSF1                  | RPL38                 |
| PIM1                  | HLA-DQB2              |
| COPS7A                | EI24                  |
| PDCD7                 | DHRS12                |
| SUPT4H1               | PPP1R3F               |
| CMTM6                 |                       |

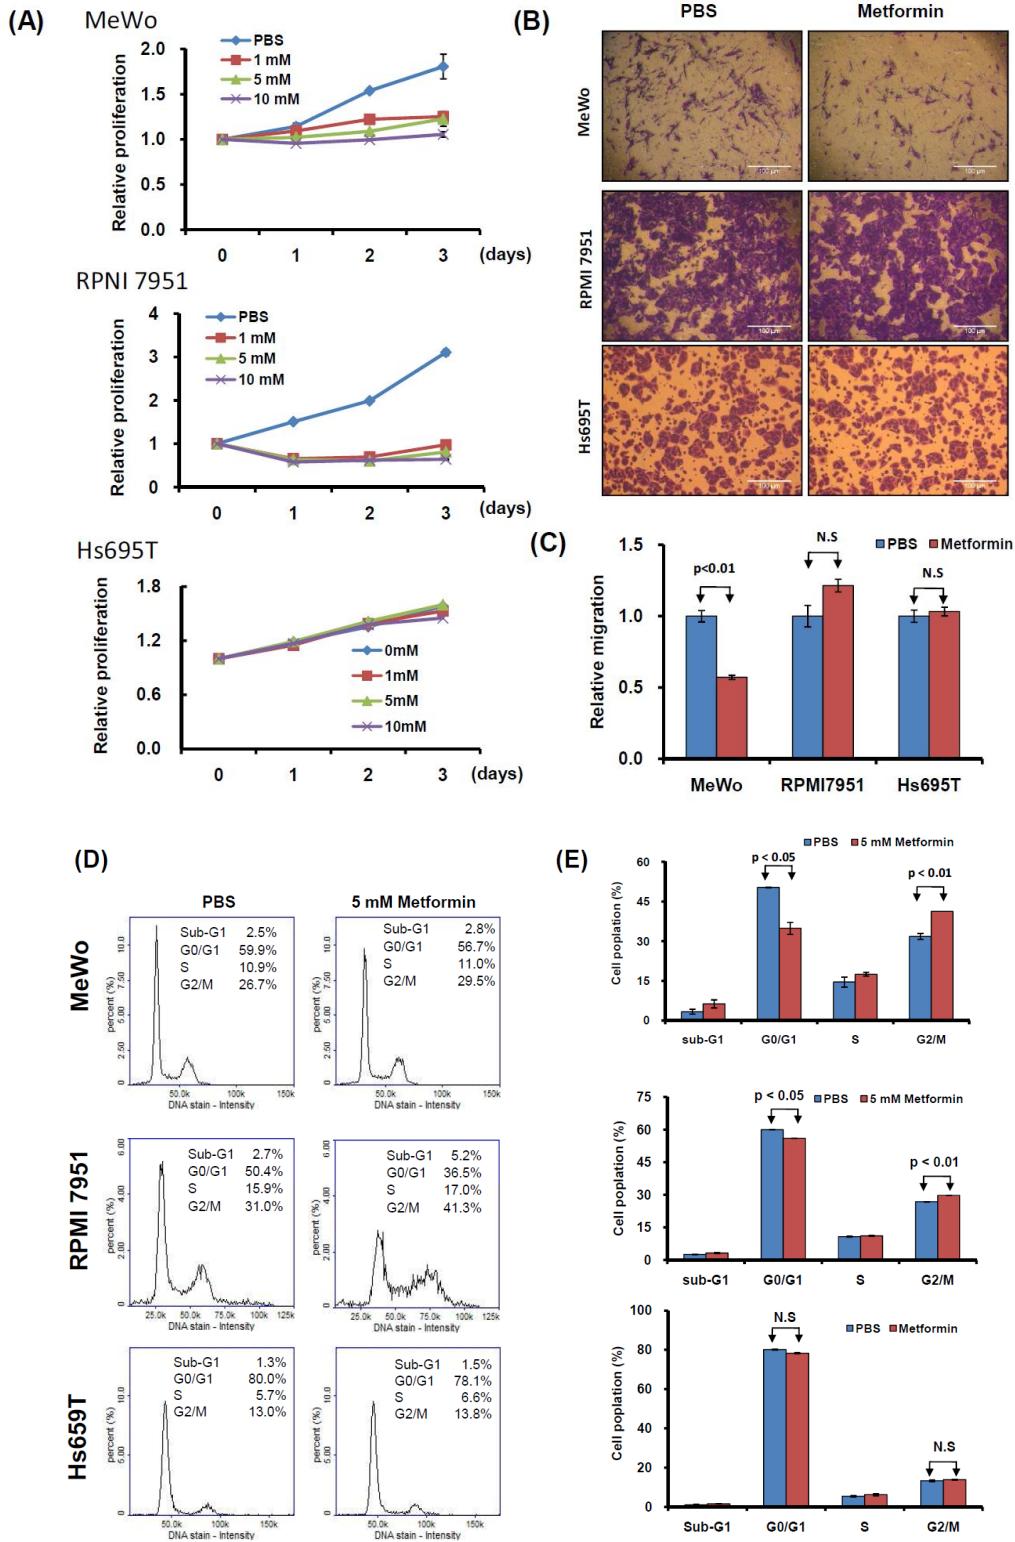

**Figure S1.** Proliferation and motility of melanoma cells were suppressed after metformin treatment. (A) Cell growth was examined in the MeWo, RPMI7951, and Hs695T cells after metformin treatment by using the CellTiter-Glo One solution assay. (B) and (C) Cell migration assay was used to examine and quantify the MeWo, RPMI7951, and Hs695T cells treated with or without metformin (5 mM) for three days. (D) and (E) Cell cycle progression was examined and quantified in the MeWo, RPMI7951, and Hs695T cells treated with or without metformin.

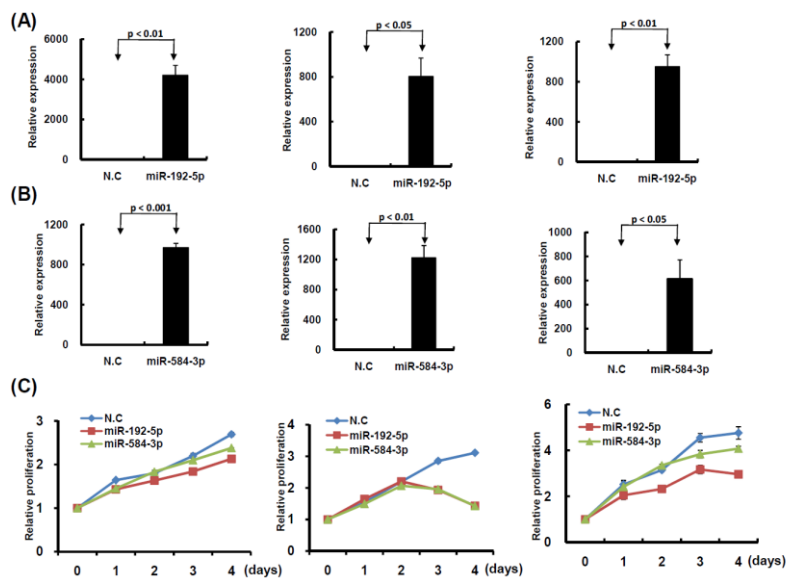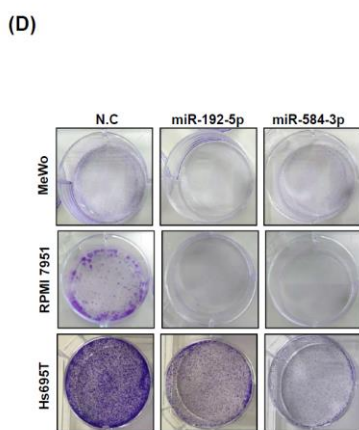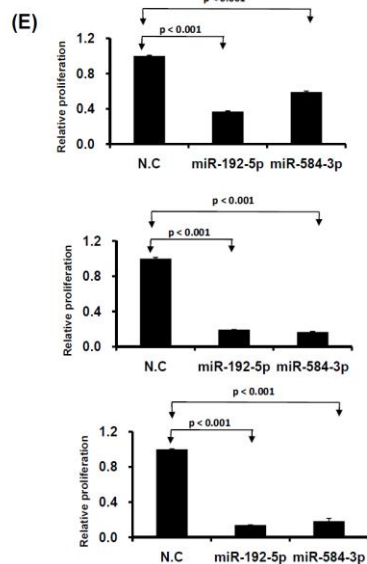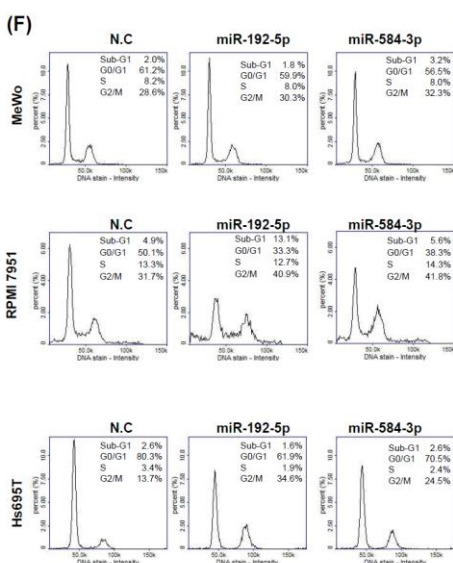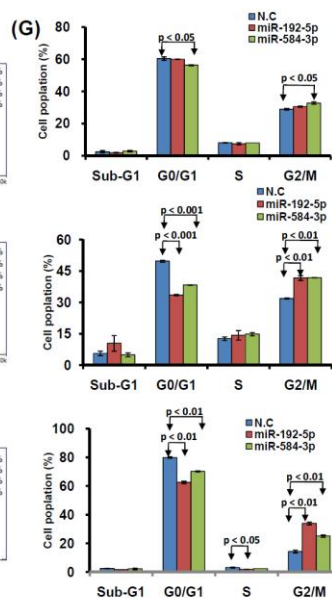

**Figure S2.** Growth of melanoma cells was suppressed after transfection of miR-192-5p and miR-584-3p mimic candidates. (A) and (B) After transfection of miRNA mimics, the relative expression levels of miR-192-5p and miR-584-3p were examined in the MeWo, RPMI7951, and Hs695T cells through real-time PCR. (C) After miR-192-5p, miR-584-3p, and control, respectively, were transfected into the melanoma cells, cell proliferation was assessed. (D) and (E) Colony formation was examined with crystal violet and quantified using OD595 nm. (F) and (G) Cell cycle progression was examined and quantified in the MeWo, RPMI7951, and Hs695T cells after miR-192-5p or miR-584-3p transfection.

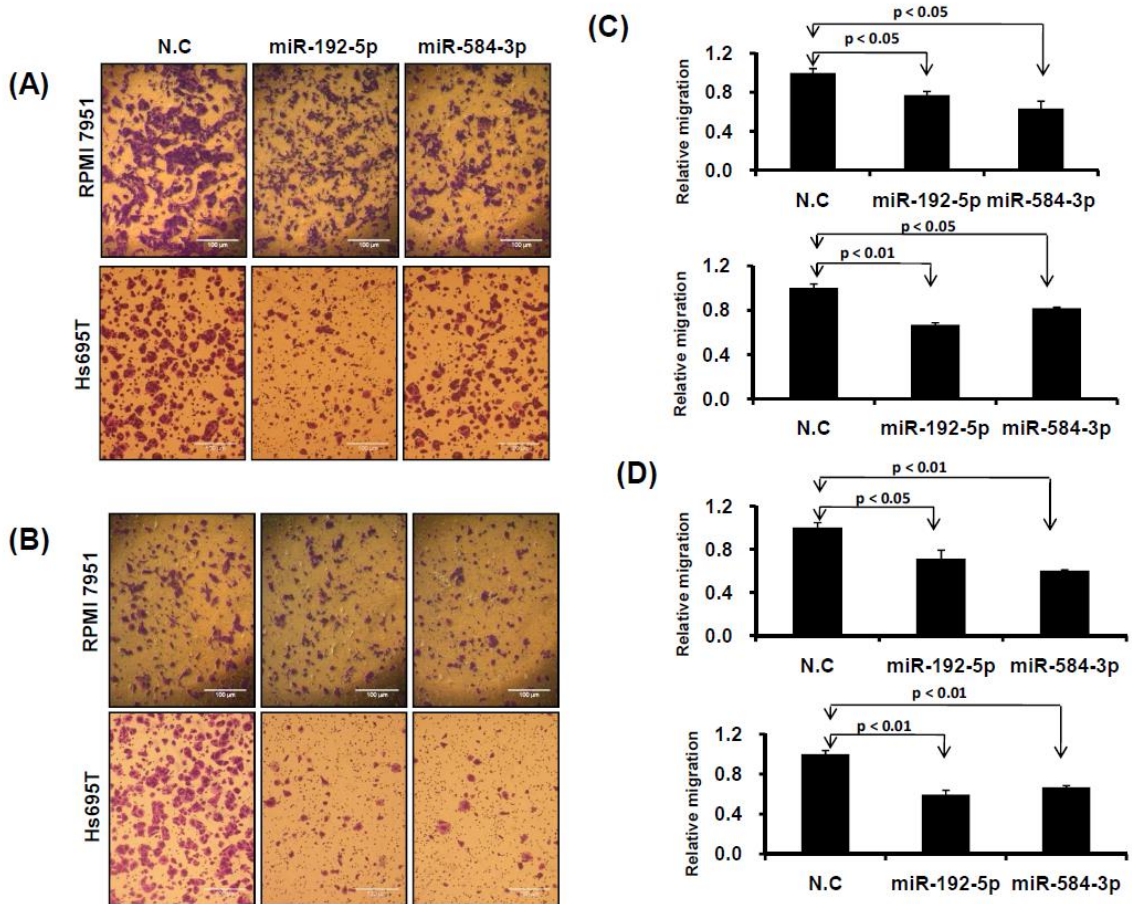

**Figure S3.** Motility of melanoma cells was suppressed after transfection with miR-192-5p and miR-584-3p mimic candidates. (A) and (B) The cell migration and invasion ability were examined in three melanoma cells, MeWo, RPMI7951, and Hs695T, after miR-192-5p or miR-584-3p transfection. (C) and (D) Then, the numbers of migrating or invading cells were quantified by counting three different fields under a phase-contrast microscope. The cell photographs from a representative experiment are presented, and the graph data were quantified using Ascent software. Data are reported as colonies compared with control (mean ± SD).

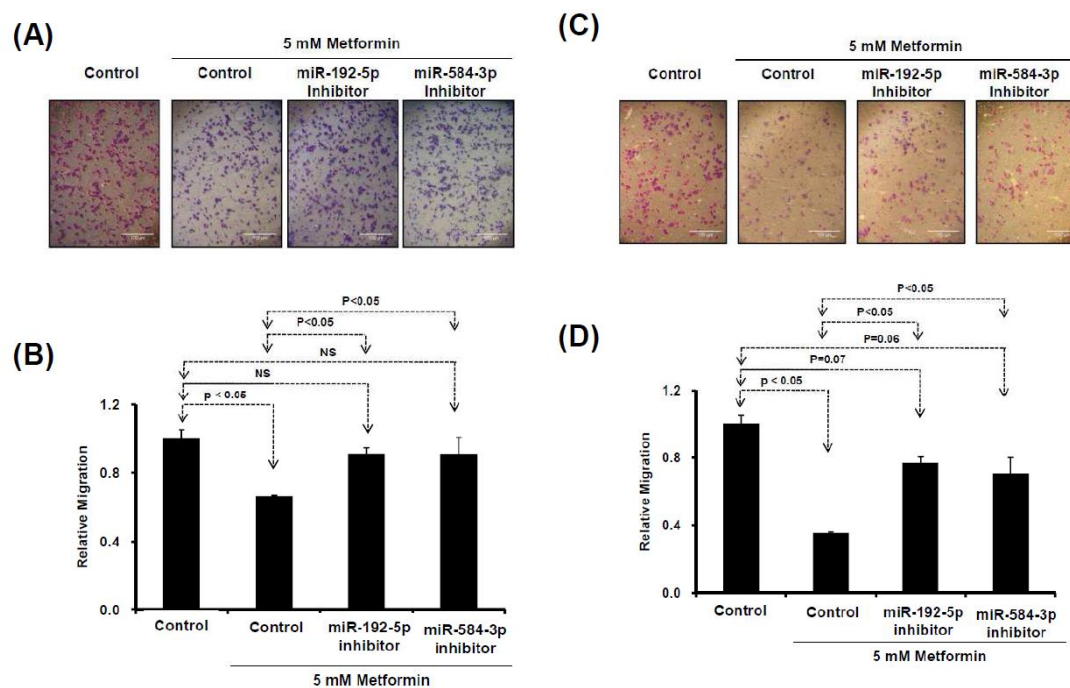

**Figure S4.** Partial improvement made by miR-192-5p and miR-584-3p inhibitors in the metformin-induced suppression of melanoma cell motility. (A) and (C) Migration ability was examined using a Transwell assay in A2058 and A375 cells with miR-192-5p and miR-584-3p inhibitor transfection. After transfection with the miR-192-5p inhibitor, miR-584-3p inhibitor, or scramble control for 24 h, the cells were treated with or without metformin and then subjected to a Transwell assay. Migrating cells were stained with a crystal violet solution. (B) and (D) Number of migrating cells was determined by counting three fields under a phase-contrast microscope. Photographs of the cells from a representative experiment are presented, and the graph data were quantified using Ascent software. Data are reported as colonies compared with the control (mean  $\pm$  SD).

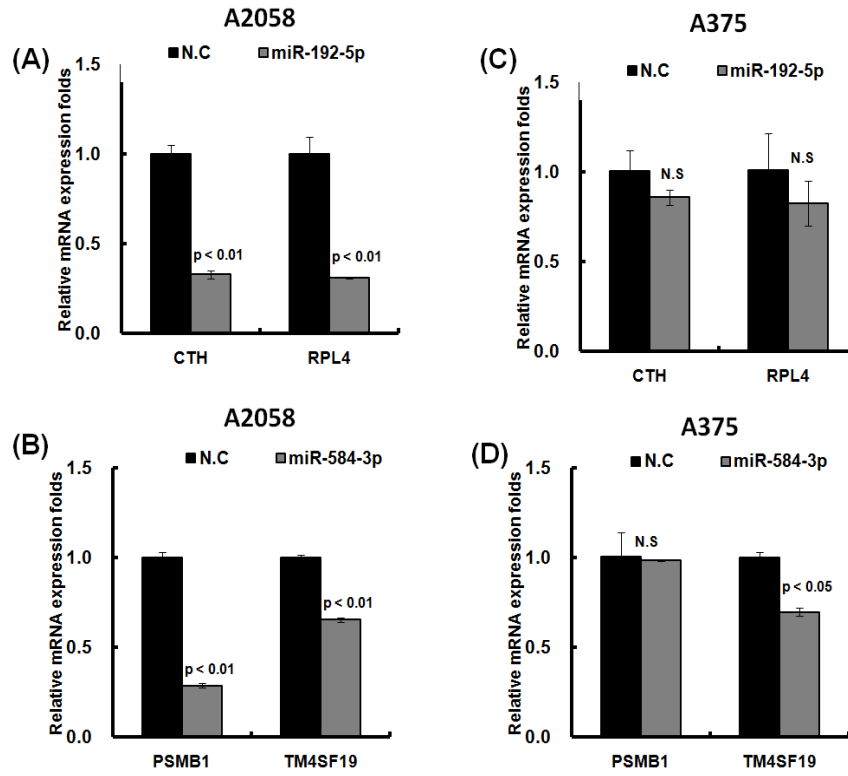

**Figure S5.** Expression levels of CTH, RPL4, PSMB1, and TM4SF19 were examined through real-time PCR in two melanoma cells with miR-192-5p (A and B) and miR-584-3p (C and D) transfection.

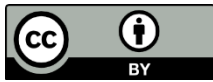

© 2019 by the authors. Licensee MDPI, Basel, Switzerland. This article is an open access article distributed under the terms and conditions of the Creative Commons Attribution (CC BY) license (<http://creativecommons.org/licenses/by/4.0/>).
